# Supplementary material for: Effect of dibucaine hydrochloride on raft-like lipid domains in model membrane systems
Source: Royal Society of Chemistry journal article supplement (doi:10.1039/c5md00108k), 2015-01-01
Supplement: c5md00108k1.pdf [file c5md00108k1.pdf]

Electronic Supplementary Information for  
Effect of dibucaine hydrochloride  
on raft-like lipid domains  
in model membrane systems

Kazunari Yoshida,\* Akito Takashima, and Izumi Nishio

E-mail: yoshida.k09@nishio-lab.net

## Contents

|   |                                                  |    |
|---|--------------------------------------------------|----|
| 1 | Two-dimensional autocorrelation (2D-AC) analyses | S2 |
| 2 | Microscopic image of ambiguous domain pattern    | S3 |
| 3 | Fourier spectrum                                 | S4 |

# 1 Two-dimensional autocorrelation (2D-AC) analyses

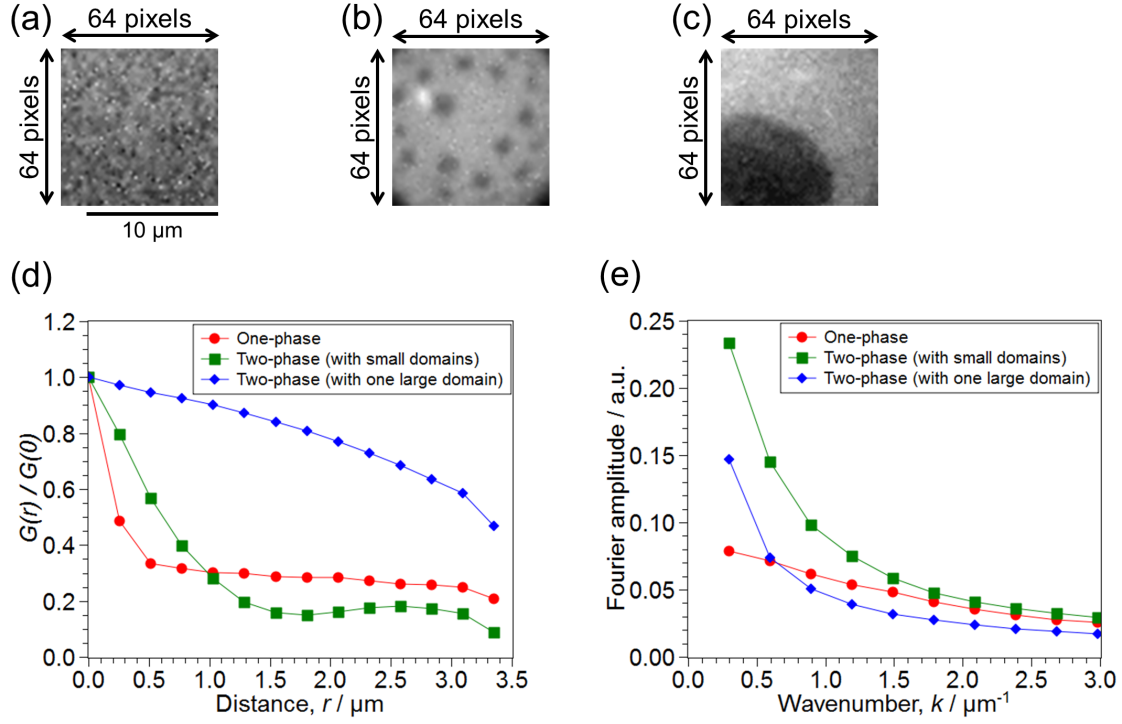

Figure S1: (a, b and c) Typical fluorescence microscopic images of one-phase liposome (a) and two-phase liposomes with small scattered (b) and large (c) Lo domains, respectively. (d) Angle-averaged 2D-AC functions,  $G(r)/G(0)$ , of each domain pattern, corresponding to (a, b and c). (e) Fourier spectrum of each domain pattern, corresponding to (a, b, c and d).

## 2 Microscopic image of ambiguous domain pattern

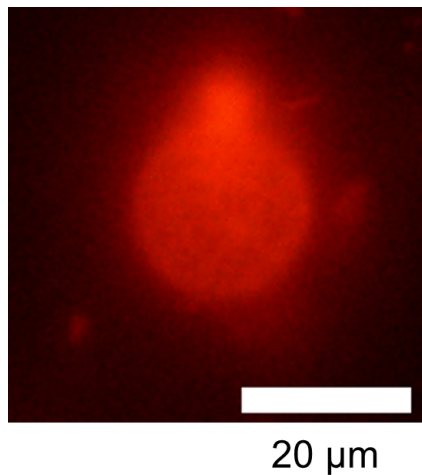

Figure S2: Example of microscopic image of ambiguous domain pattern. This liposome was observed with 0.05 mM DC·HCl at 30 °C. Scale bar represents 20  $\mu\text{m}$ .

### 3 Fourier spectrum

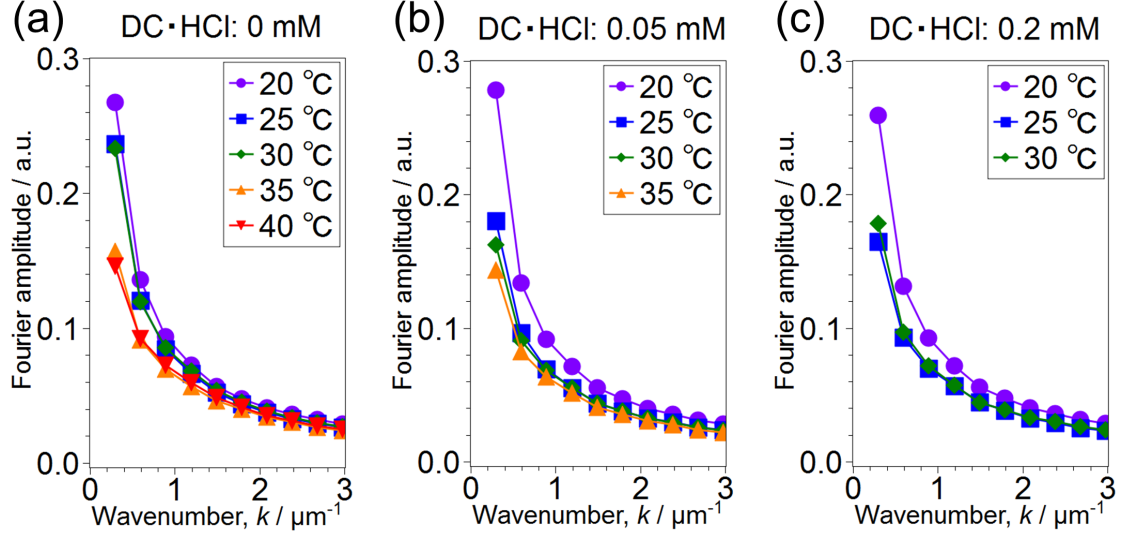

Figure S3: (a, b and c) Mean values of the Fourier amplitudes of the  $G(r)/G(0)$  curves as a function of wavenumber ( $k$ ) at 0, 0.05 and 0.2 mM DC·HCl, respectively ( $n \geq 10$  under each set of conditions, error bars not shown).
